# Supplementary material for: Gbb Regulates Blood Cell Proliferation and Differentiation through JNK and EGFR Signaling Pathways in the Drosophila Lymph Gland
Source: MDPI journal article supplement (doi:10.3390/cells12040661), 2023-02-19
Supplement: s1 [file s1]

Supplementary file 1

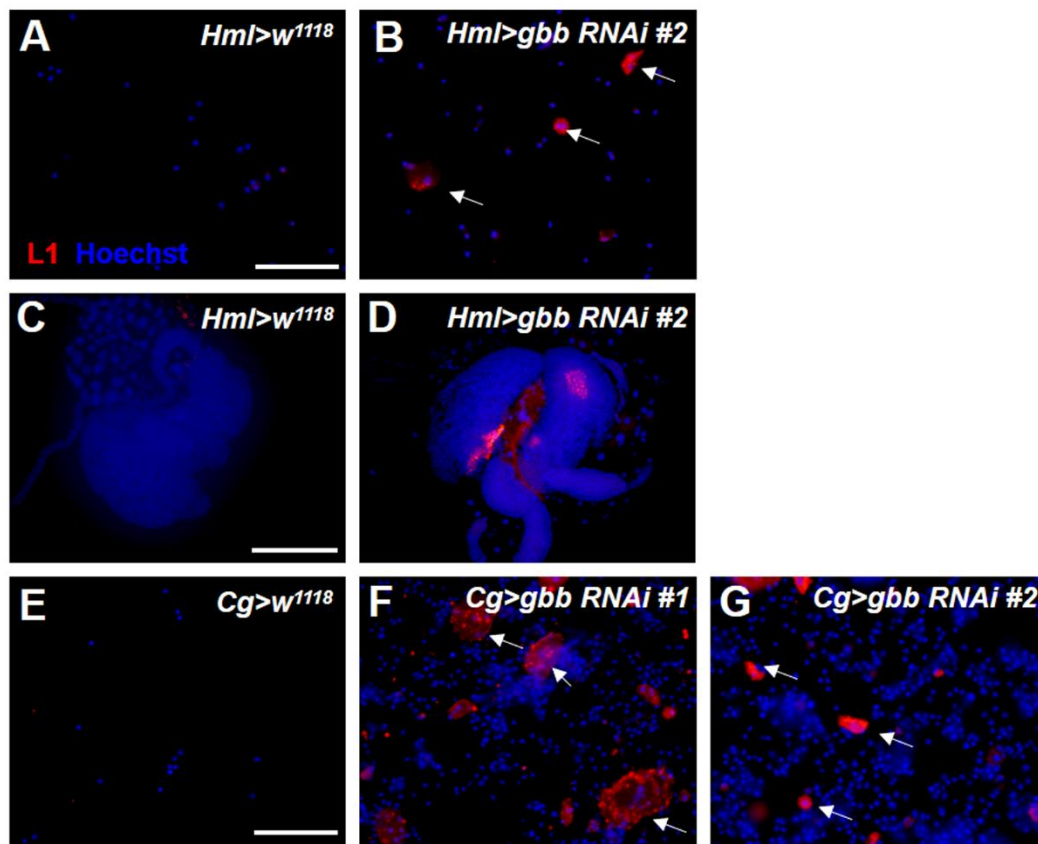

**Figure S1.** The knockdown of *gbb* in the maturing hemocytes can induce lamellocyte differentiation. (A-G) Immunostaining against lamellocyte marker L1 in the circulating hemocytes (A, B, E-G) and lymph glands (C, D) of third-instar larvae. The arrows in B, F and G indicate the lamellocyte. Scale bars: 50 μm (A, B, E-G), 100 μm (C, D).

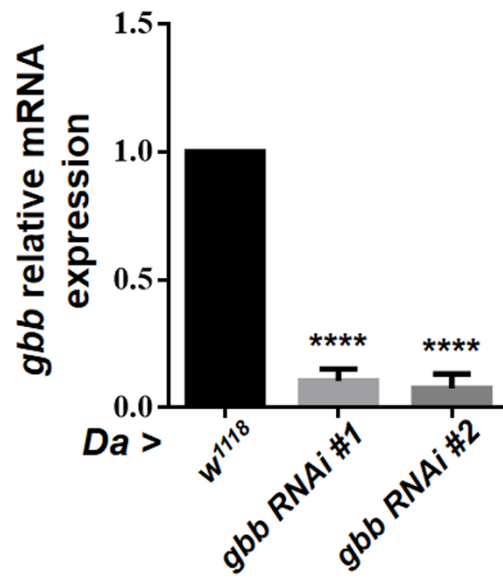

**Figure S2.** Real-time PCR analysis of the *gbb* level in the third-instar larvae.

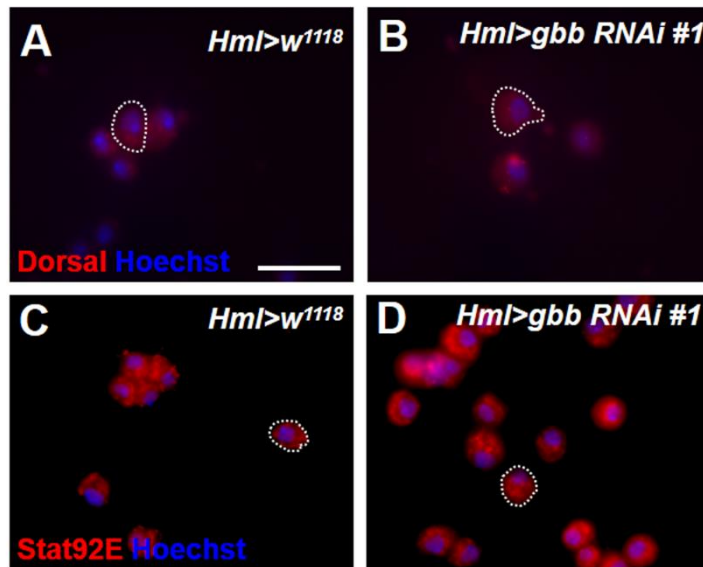

**Figure S3.** The knockdown of *gbb* does not induce the activation of Toll and JAK-STAT pathways. (A, B) Immunostaining against Dorsal in the circulating hemocytes. (C, D) Immunostaining against Stat92E in the circulating hemocytes. Dashed white lines in I, J, O and P outline the edges of circulating hemocytes. Scale bars: 20  $\mu$ m (A-D).

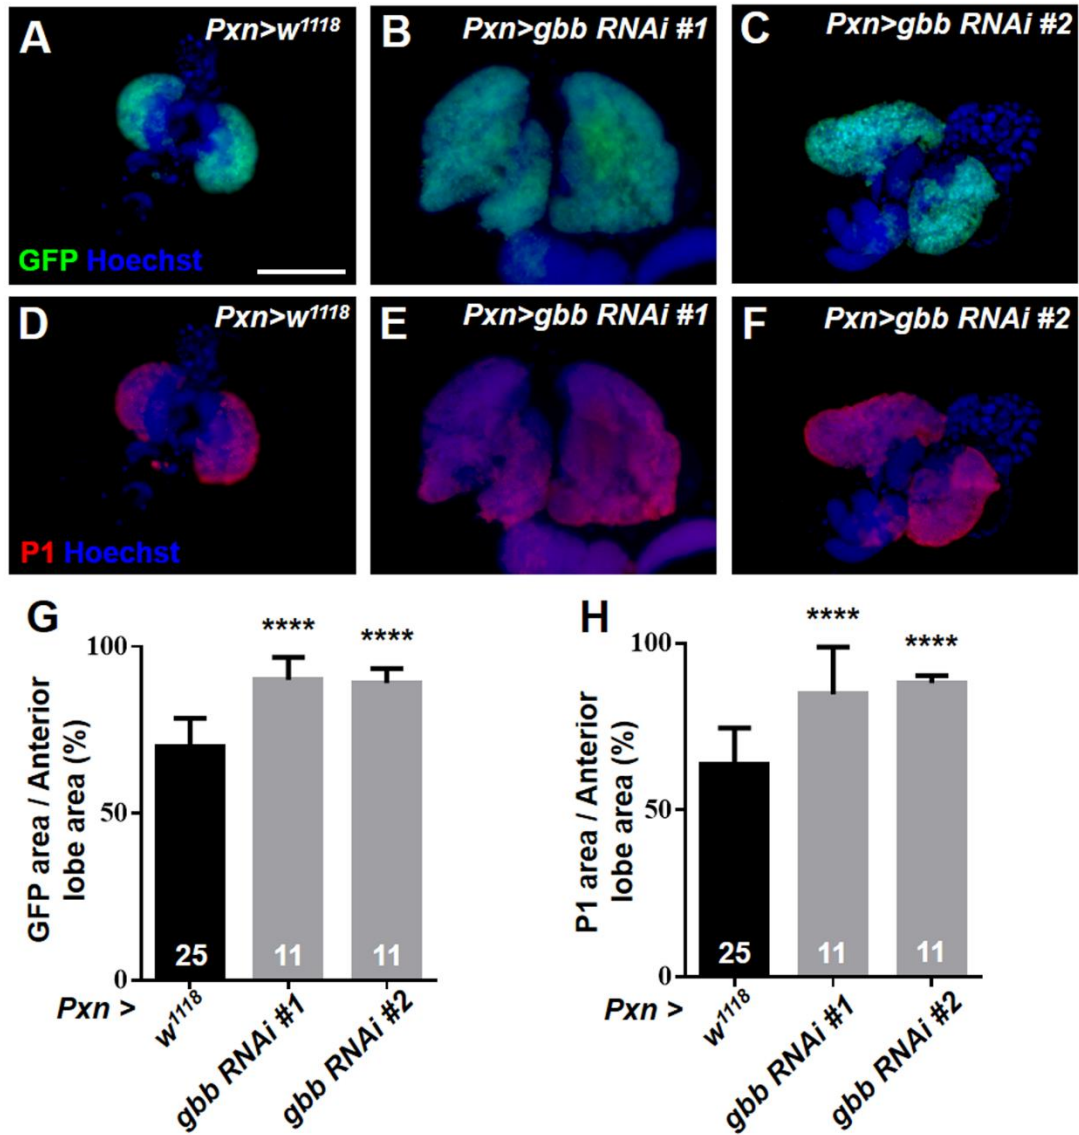

**Figure S4.** The knockdown of *gbb* in the CZ induces plasmatocyte differentiation. (A-C) The Pxn-GFP-positive area represented the area of the CZ. (D-F) Immunostaining for the plasmatocyte marker P1 showed that the P1-positive area was increased in *Pxn>gbb RNAi#1* (E) or *Pxn>gbb RNAi#2* lymph glands (F). (G, H) Quantification of the proportions of the anterior lobes occupied by the Pxn-GFP + area (G) and P1+ area (H), respectively. Scale bars: 100  $\mu$ m (A-F).
